# Supplementary material for: miR204 potentially promotes non-alcoholic fatty liver disease by inhibition of cpt1a in mouse hepatocytes
Source: PubMed Central journal article supplement (PMC9492679; doi:10.1038/s42003-022-03945-1), 2022-09-21

**Supplementary Fig. 1 Correlation of lipid accumulation and miR204 expression in IDH2 deleted hepatocytes with 1 mM fatty acid (Oleic acid 0.66 mM : palmitic acid 0.33 mM).**

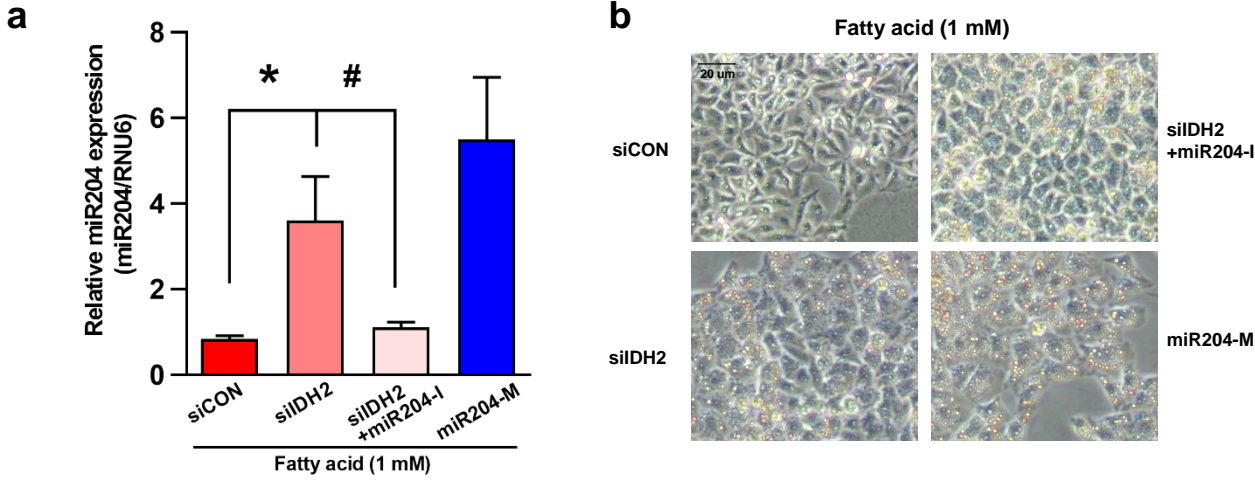

These cells were first transfected siCON, siIDH2, miR204-I and miR204-M after 24 h, and then treated fatty acid 24 h. **a** miR204 expression in hepatocytes; RNU6 was used as the internal control. **b** Oil Red O staining of hepatocytes. Scale bars, 20  $\mu$ m. Data are means  $\pm$  SEM of three independent experiments.

\*p < 0.05 vs. control hepatocyte. #p < 0.05 vs. siIDH2 transfected hepatocyte.

# Supplementary Fig. 2 Inhibition of miR204 rescues Fatty Acid Oxidation (FAO) in IDH2 deficient hepatocytes

a

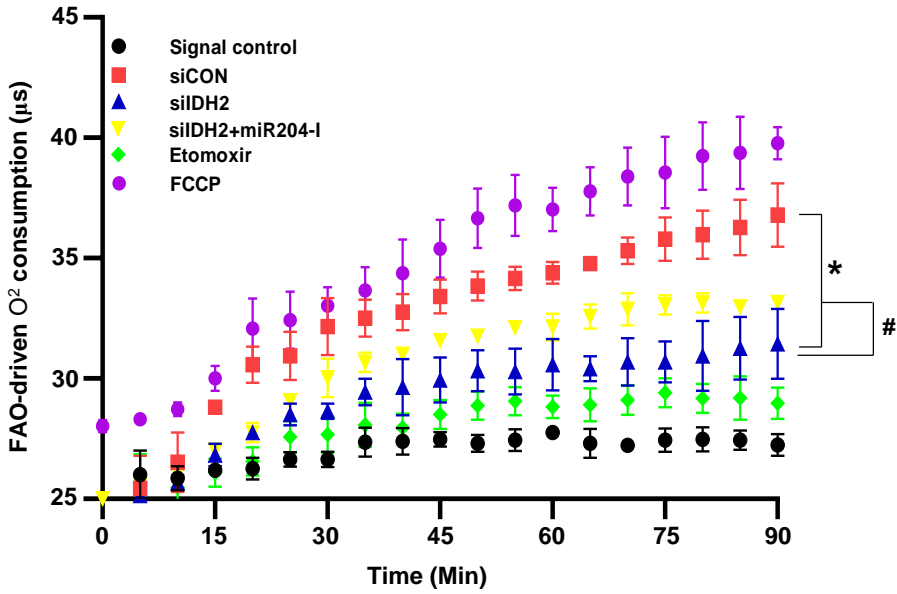

These cells were first transfected siCON, siIDH2 and siIDH2+miR204 after 24 h, and then measured FAO. **a** FAO activity in hepatocytes; FCCP and Etomoxir were used as the positive control and Negative control in FAO activity, respectively. Data are means  $\pm$  SEM of three independent experiments.

\*p < 0.05 vs. siCON transfected hepatocyte. #p < 0.05 vs. siIDH2 transfected hepatocyte.



Fig.4E

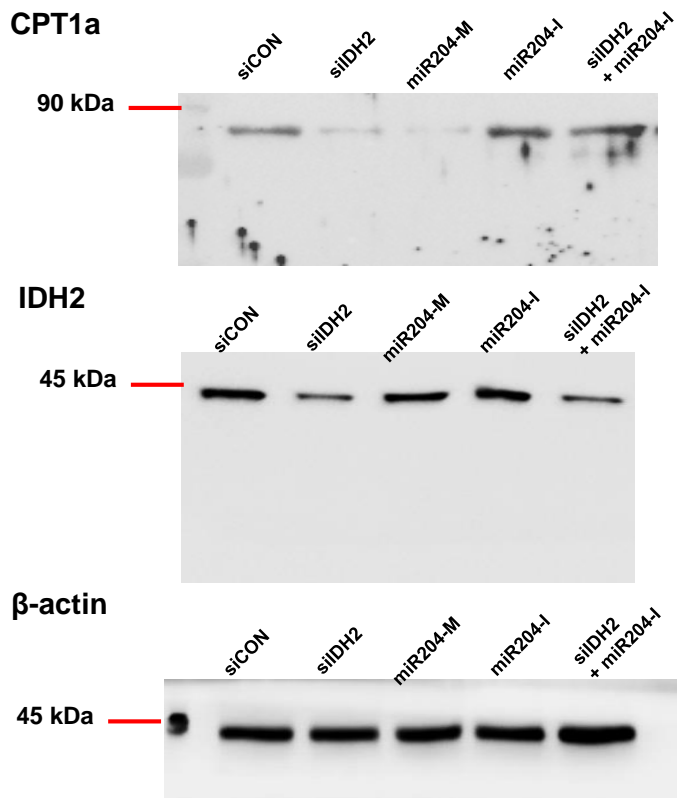

Fig.5B

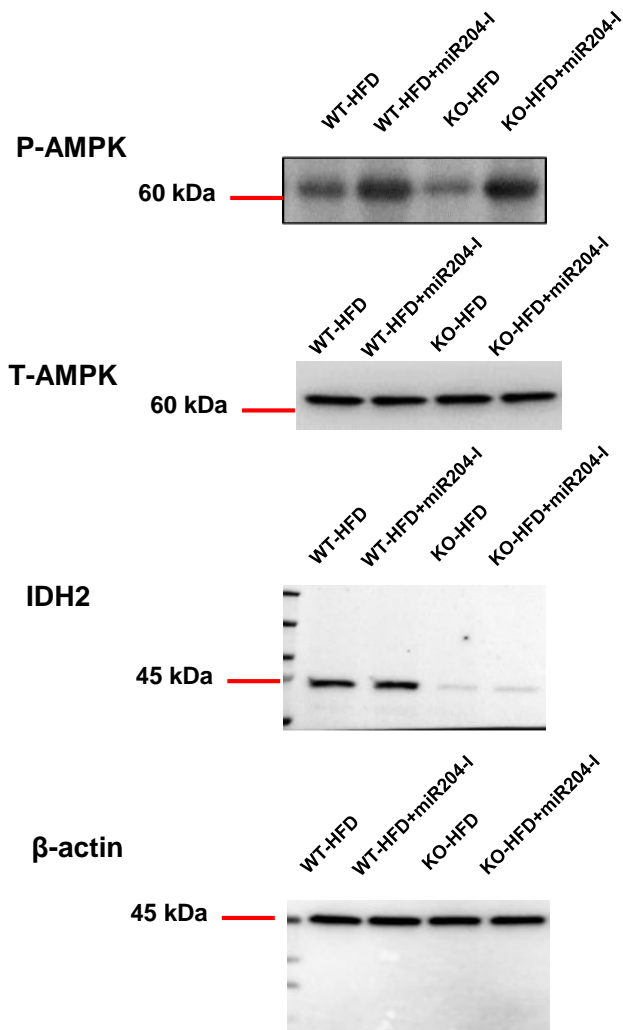

Fig.5B

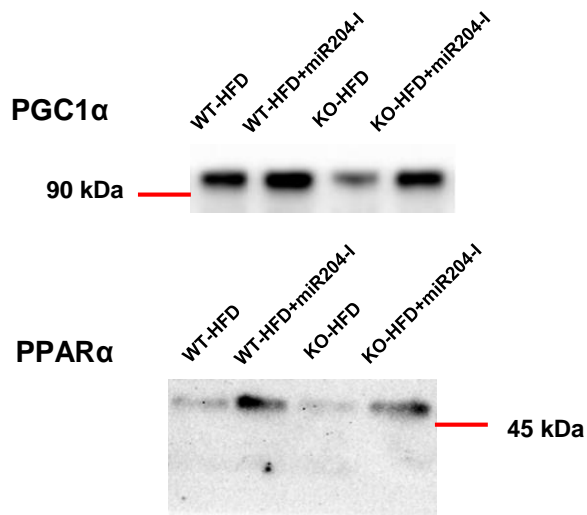

Fig.6J

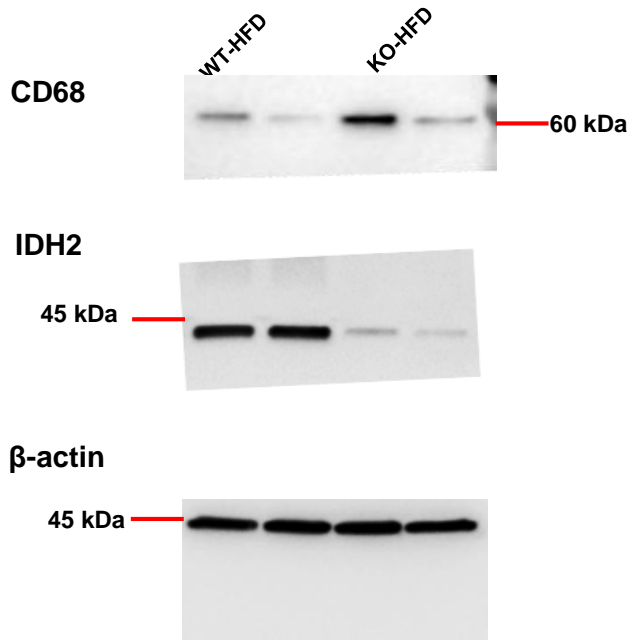

Supplement: 42003_2022_3945_MOESM1_ESM.pdf [file 42003_2022_3945_MOESM1_ESM.pdf]
